# Supplementary material for: Divalent metal coordination polymers assembled from dual linkers – semirigid carboxyphenylpropionate and dipyridyl type molecule
Source: Royal Society of Chemistry journal article supplement (doi:10.1039/c1ce05760j), 2011-11-21
Supplement: c1ce05760j.pdf [file c1ce05760j.pdf]

## Supplementary information

### Divalent metal coordination polymers assembled from dual linkers — semirigid carboxyphenylpropionate and dipyridyl type molecule

Guang-Zhen Liu, Jian-Ge Wang and Li-Ya Wang\*

College of Chemistry and Chemical Engineering, Luoyang Normal University, Luoyang 471022, P. R. China

\*Corresponding authors. Fax: +86-379-65511205; Tel: +86-0379-65523593; E-mail: [wlya@lynu.edu.cn](mailto:wlya@lynu.edu.cn)

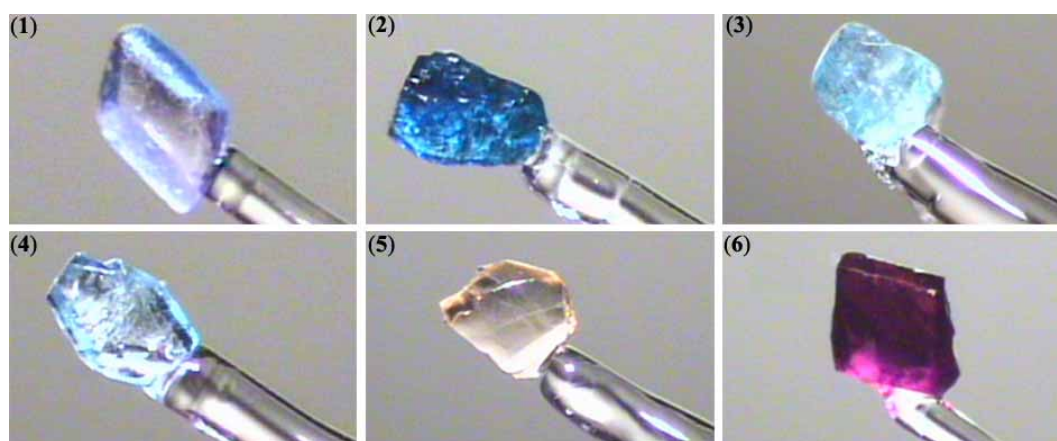

Fig. S1 The crystal photos of complexes 1-6.

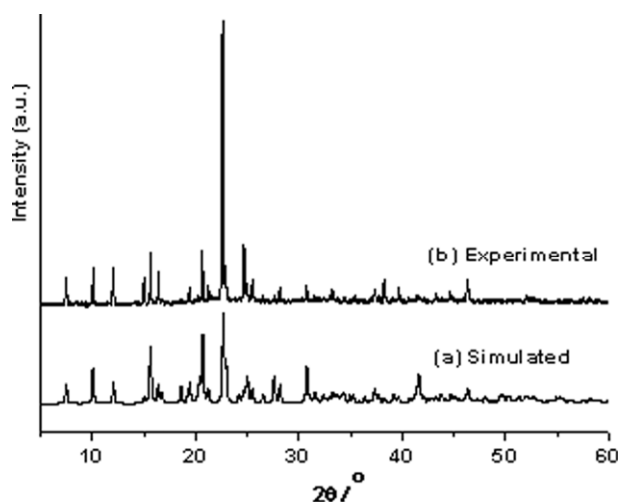

Fig. S2 The experimental and simulated PXRD patterns for complex 1.

\*To whom correspondence should be addressed. E-mail: [wlya@lynu.edu.cn](mailto:wlya@lynu.edu.cn).

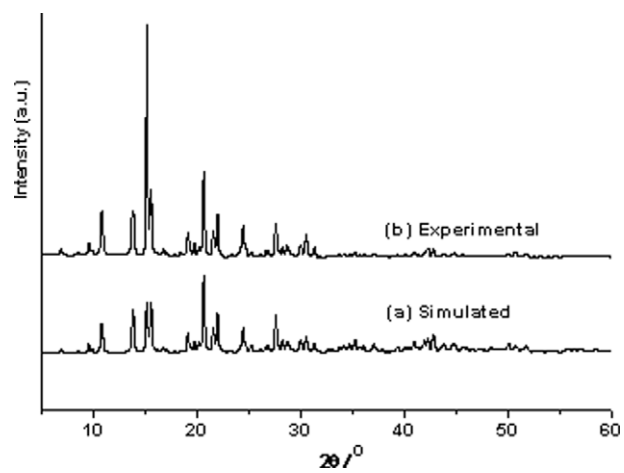

**Fig. S3** The experimental and simulated PXRD patterns for complex 2.

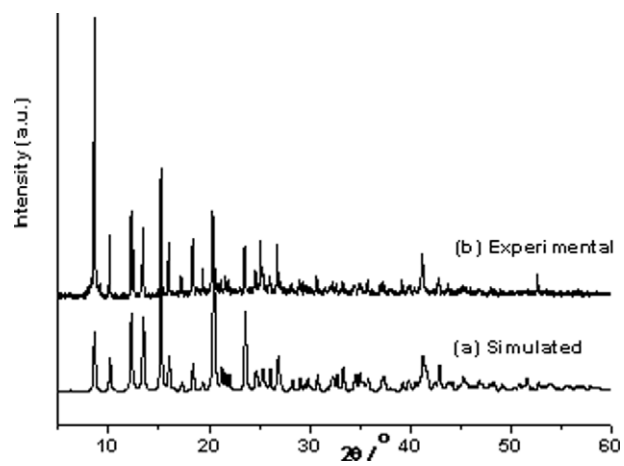

**Fig. S4** The experimental and simulated PXRD patterns for complex 3.

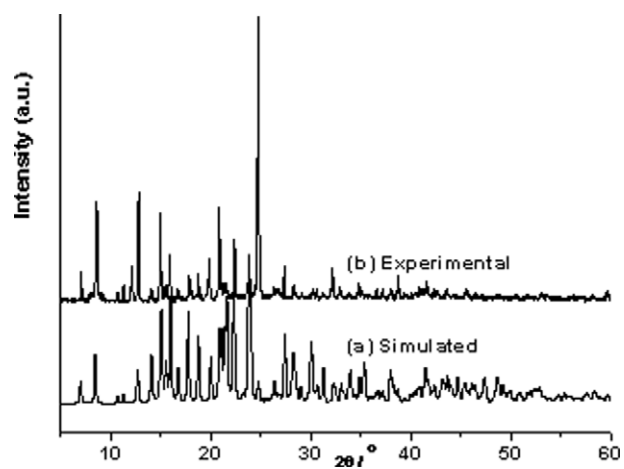

**Fig. S5** The experimental and simulated PXRD patterns for complex 4.

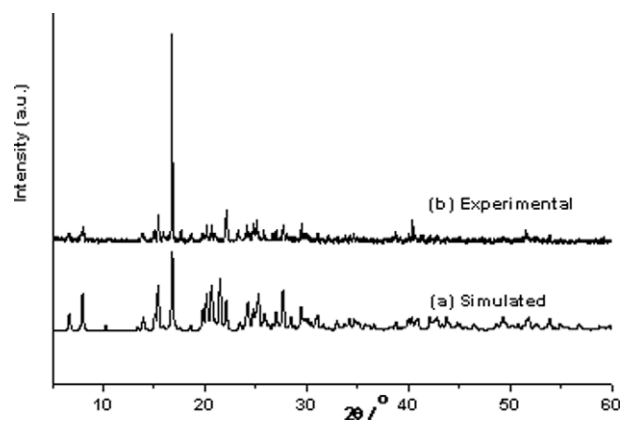

Fig. S6 The experimental and simulated PXR D patterns for complex 5.

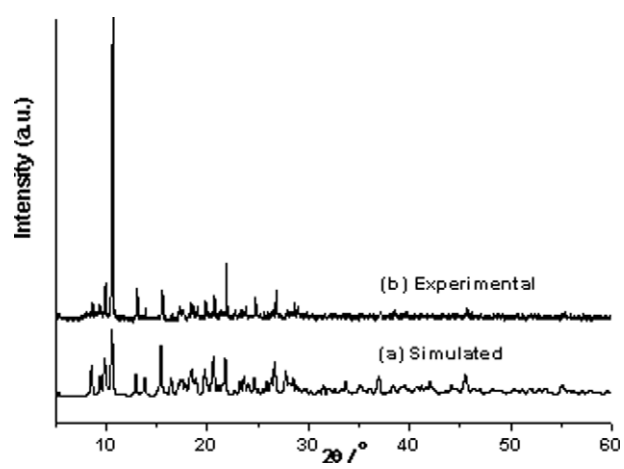

Fig. S7 The experimental and simulated PXR D patterns for complex 6.

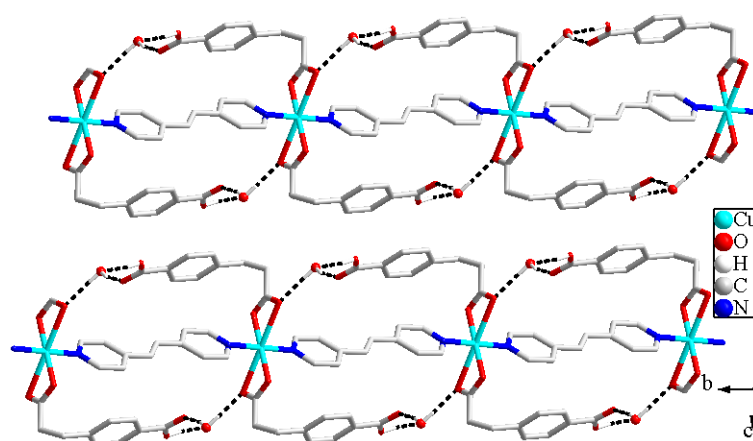

Fig. S8 View of 3D packing for complex 1.

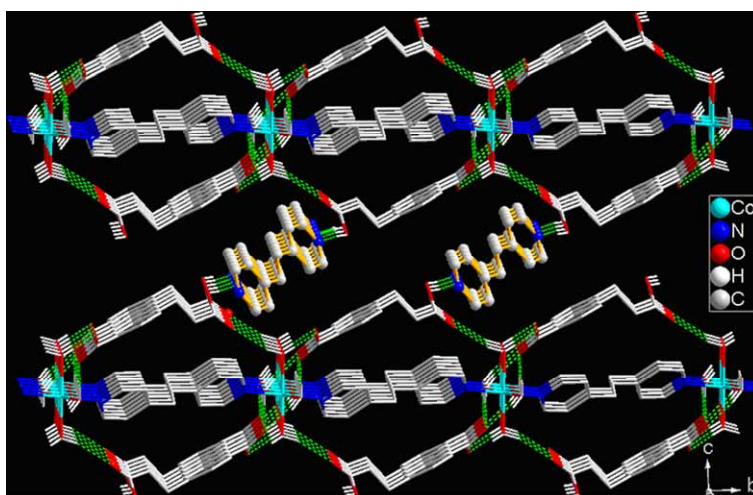

**Fig. S9** View of 3D packing for complex **5**.

**Table S1** The details of hydrogen bonds in **2**<sup>a</sup>

| D-H...A               | d(D-H) | d(H...A) | d(D...A) | ∠(DHA) |
|-----------------------|--------|----------|----------|--------|
| O(9)-H(1W)...O(4)     | 0.85   | 2.03     | 2.830(5) | 156.2  |
| O(9)-H(2W)...O(11)#7  | 0.85   | 2.15     | 2.910(7) | 148.2  |
| O(10)-H(3W)...O(6)#5  | 0.85   | 2.18     | 2.976(5) | 155.8  |
| O(10)-H(4W)...O(12)#4 | 0.85   | 2.12     | 2.971(7) | 179.5  |
| O(11)-H(5W)...O(1)    | 0.85   | 2.10     | 2.855(4) | 147.2  |
| O(11)-H(6W)...O(10)#1 | 0.85   | 2.15     | 2.970(7) | 160.8  |
| O(12)-H(7W)...O(7)#5  | 0.85   | 2.19     | 2.955(5) | 149.4  |
| O(12)-H(8W)...O(5)#8  | 0.85   | 2.06     | 2.902(5) | 172.6  |
| O(13)-H(9W)...O(6)#8  | 0.85   | 2.15     | 2.904(4) | 147.6  |
| O(13)-H(10W)...O(7)#9 | 0.85   | 1.94     | 2.770(4) | 166.2  |

<sup>a</sup> Symmetry transformations used to generate equivalent atoms: #1  $x+1/2, y-1/2, z$ ; #2  $x-1/2, y-1/2, z$ ; #3  $x, y, z-1$ ; #4  $x+1/2, y+1/2, z$ ; #5  $x, y, z+1$ ; #6  $x-1/2, y+1/2, z$ ; #7  $x, -y, z-1/2$ ; #8  $x-1/2, -y+1/2, z+1/2$ ; #9  $x, -y, z+1/2$ .
